# Supplementary material
Source: PubMed Central journal article supplement (PMC7023998)

**Supplemental Digital Content 1. Study flowchart.** We assessed the association between DNA methylation and physical activity through a two-stage EWAS, using generalized additive models (models 1-3). DNA methylation was considered as the outcome. DNA methylomes were obtained from Infinium Human Methylation 450k or EPIC BeadChips; standardized M-values were used. Physical activity data were obtained from validated questionnaires and distributed into 5 categories. Finally, the results from the three populations were meta-analyzed.

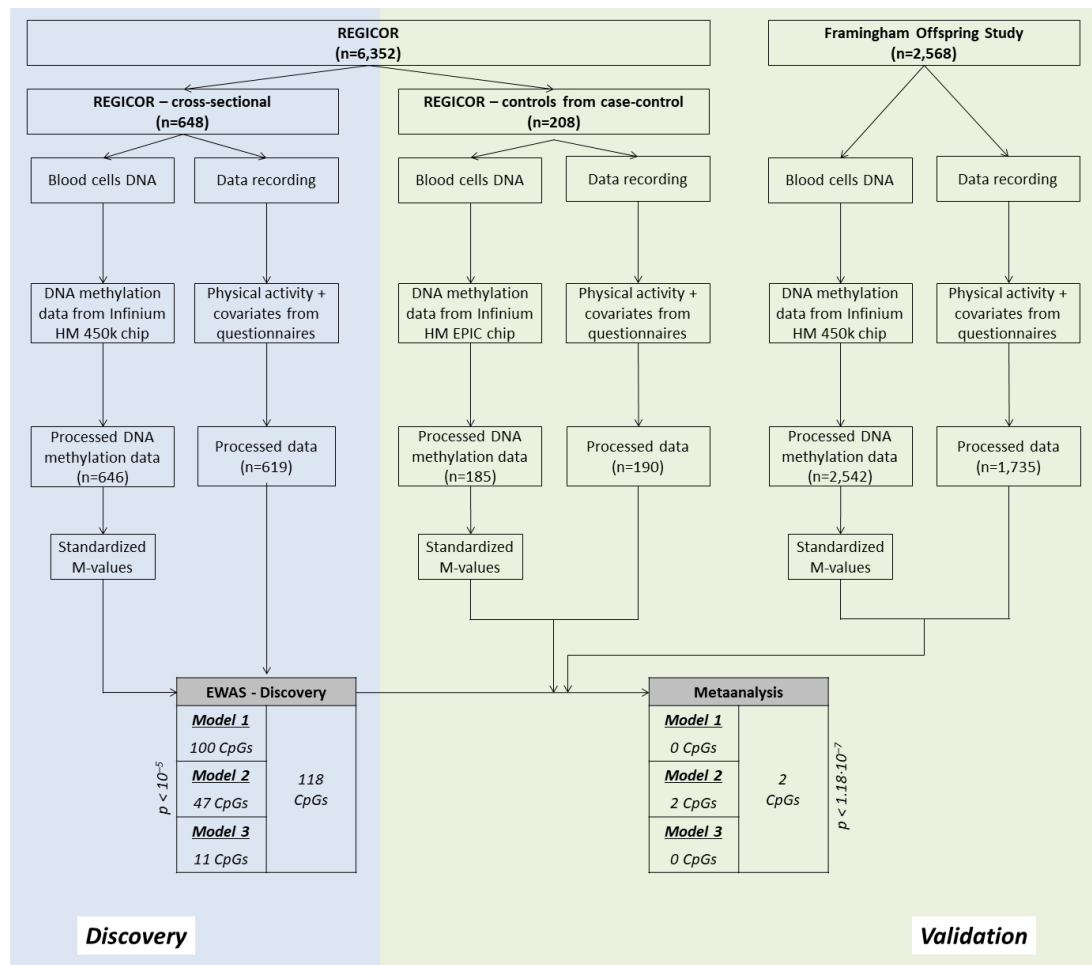

Supplement: NIHMS1540373-supplement-Supplemental_Data_File___doc___tif__pdf__etc___1.pdf [file NIHMS1540373-supplement-Supplemental_Data_File___doc___tif__pdf__etc___1.pdf]
