# Supplementary material
Source: PubMed Central journal article supplement (PMC7023998)

**Supplemental Digital Content 4. Flowchart of the data quality control prior to the main association analyses.** The first step was a quality control (QC) of the DNA methylomes of the three populations. Next, individuals with missing data in physical activity practice and smoking habits were excluded. Finally, those who reported no regular physical activity were excluded.

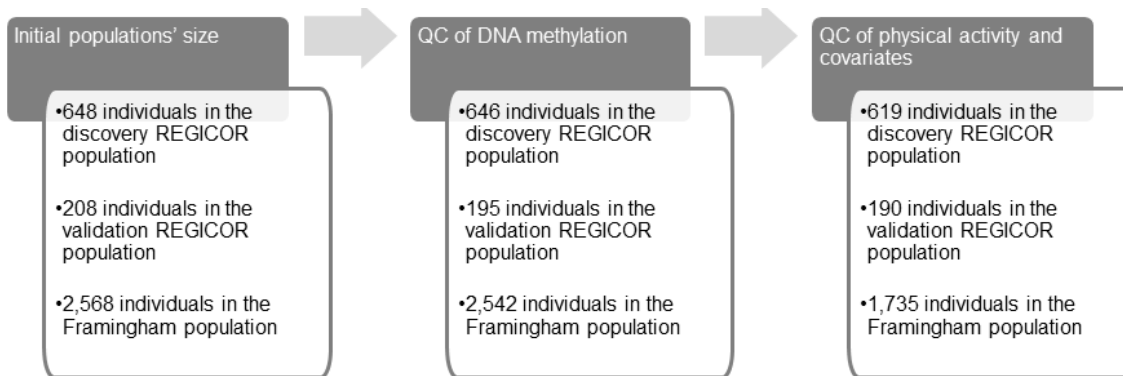

Supplement: NIHMS1540373-supplement-Supplemental_Data_File___doc___tif__pdf__etc___4.pdf [file NIHMS1540373-supplement-Supplemental_Data_File___doc___tif__pdf__etc___4.pdf]
