# Supplementary material
Source: PubMed Central journal article supplement (PMC7023998)

**Supplemental Digital Content 6.** Manhattan plots and QQ plots of the associations between DNA methylation and PA variables in the discovery stage of model 1. Plots are given for: (a) light-intensity PA (LPA), (b) moderate-intensity PA (MPA), and (c) vigorous-intensity PA (VPA). For each PA, the linear (a.1, b.1, c.1) and non-linear (a.2, b.2, c.2)  $p$ -values from the main analysis are represented.

**a.1. LPA – linear**

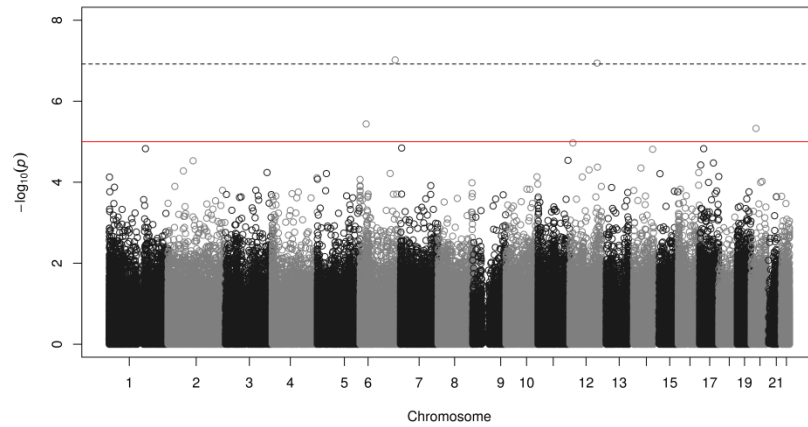

**a.2. LPA – non-linear**

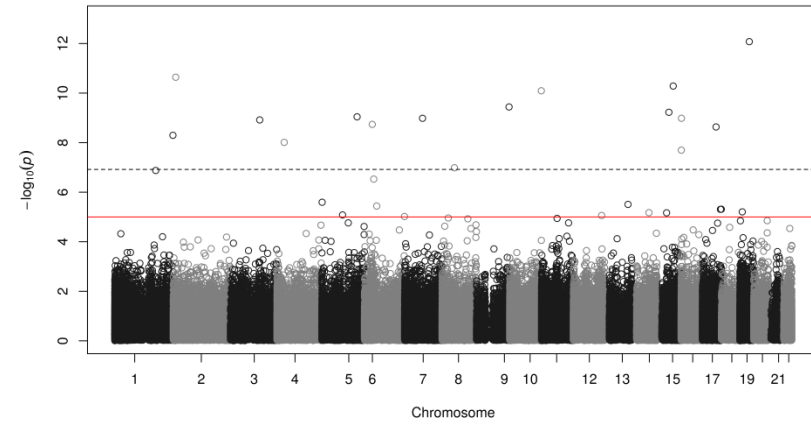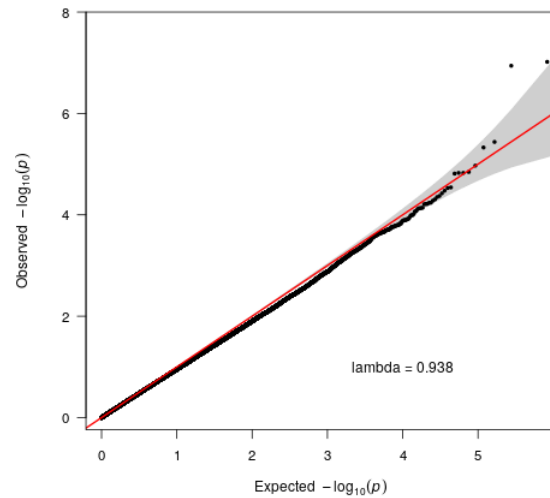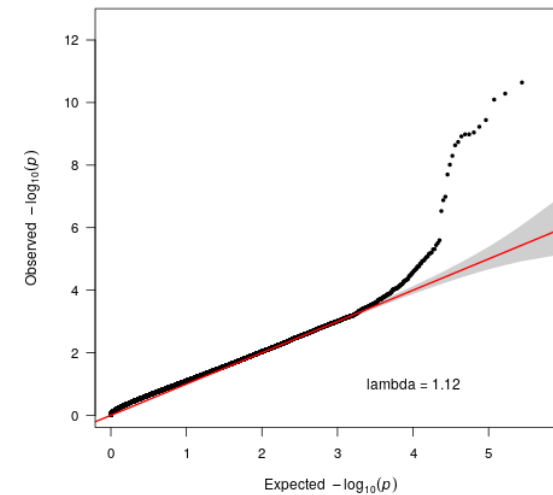

**b.1. MPA – linear**

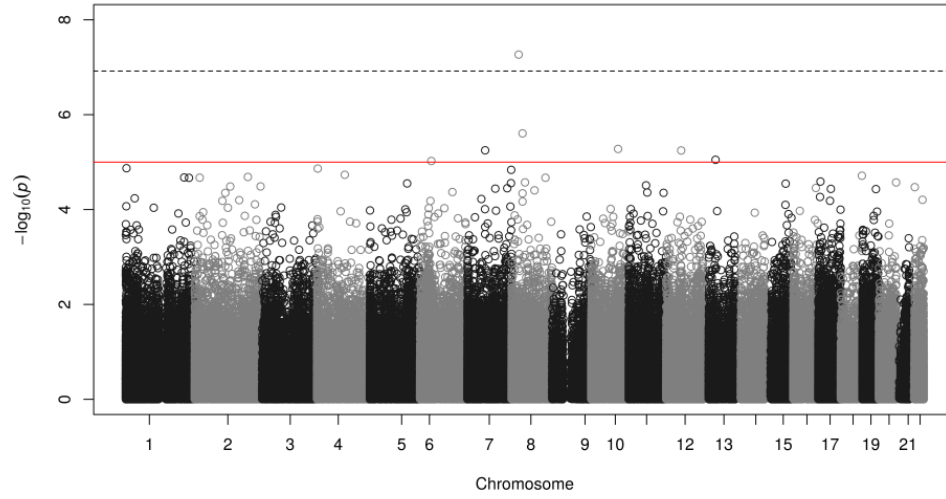

**b.2. MPA – non-linear**

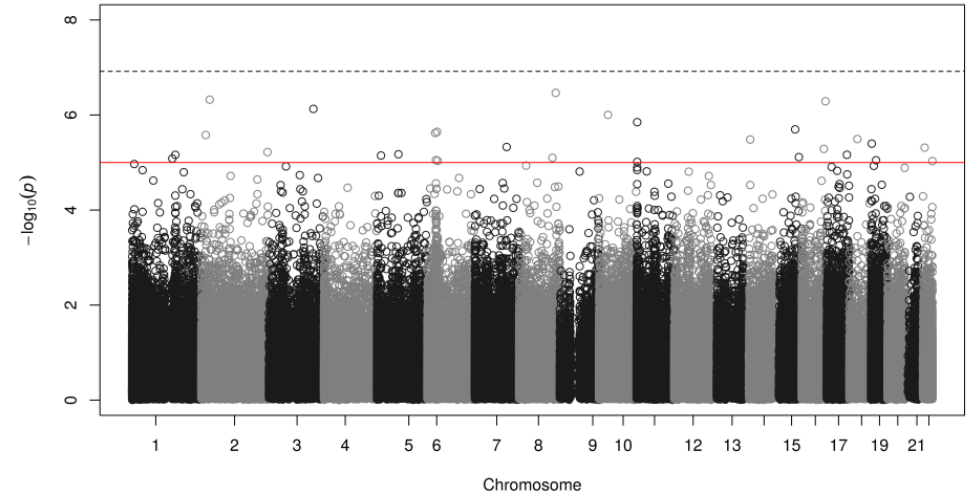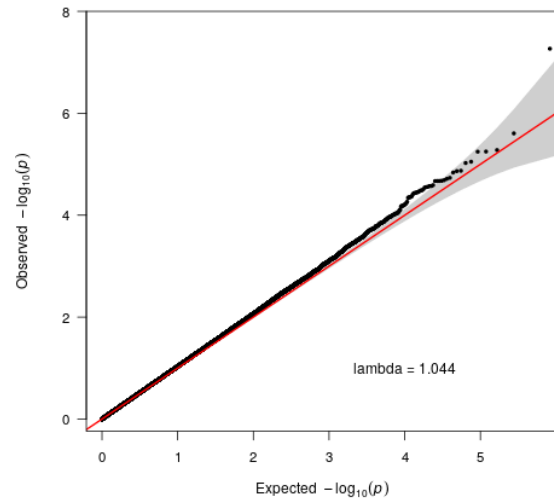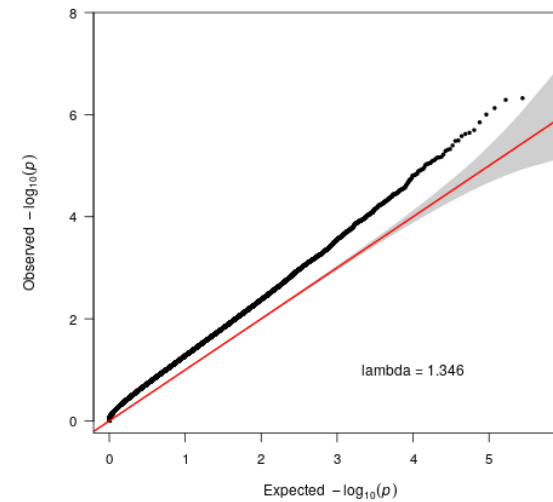

c.1. VPA – linear

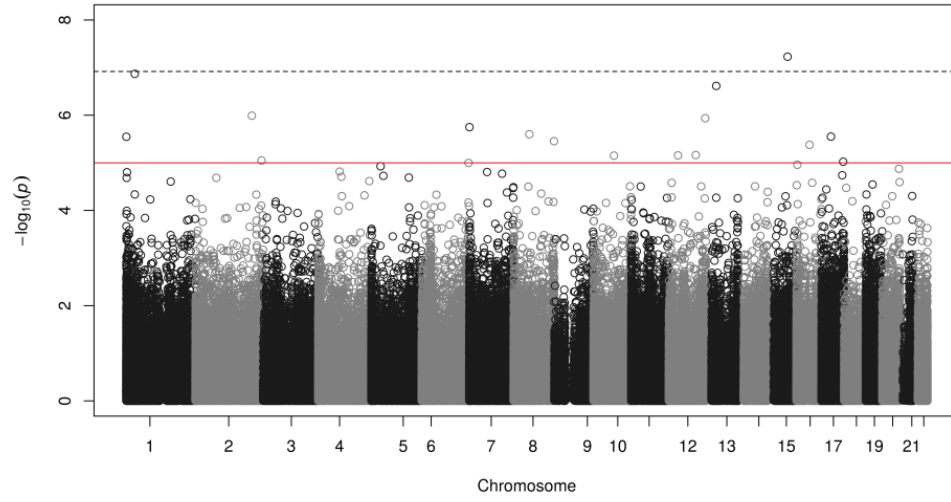

c.2. VPA – non-linear

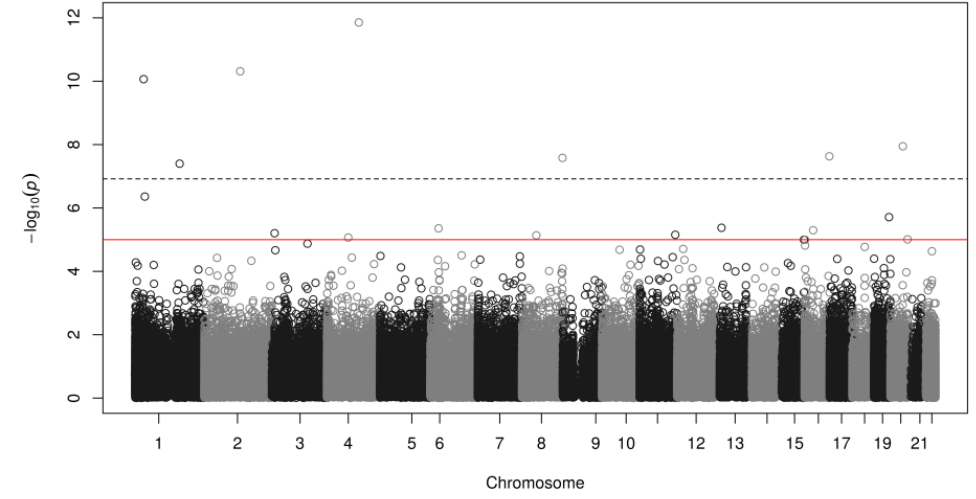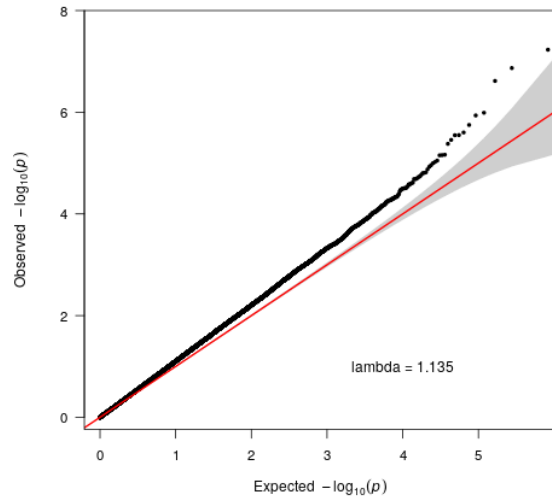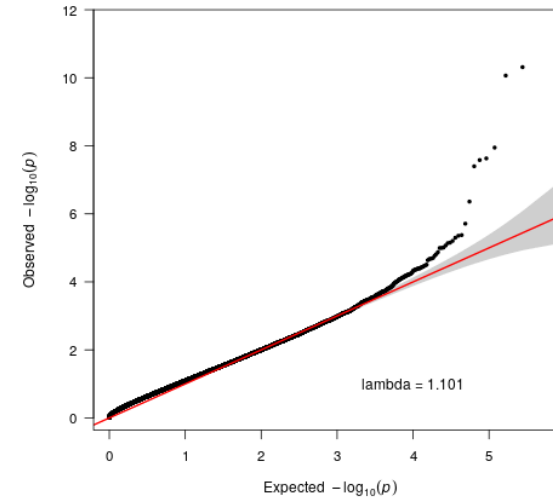

Supplement: NIHMS1540373-supplement-Supplemental_Data_File___doc___tif__pdf__etc___6.pdf [file NIHMS1540373-supplement-Supplemental_Data_File___doc___tif__pdf__etc___6.pdf]
