# Supplementary material
Source: PubMed Central journal article supplement (PMC7023998)

**Supplemental Digital Content 9. Manhattan plots and QQ plots of the associations between DNA methylation and PA variables in the discovery stage of model 3.** Plots are given for the linear (a) and non-linear (b) associations between DNA methylation and total PA (TPA) from the main analysis.

**a. TPA – linear**

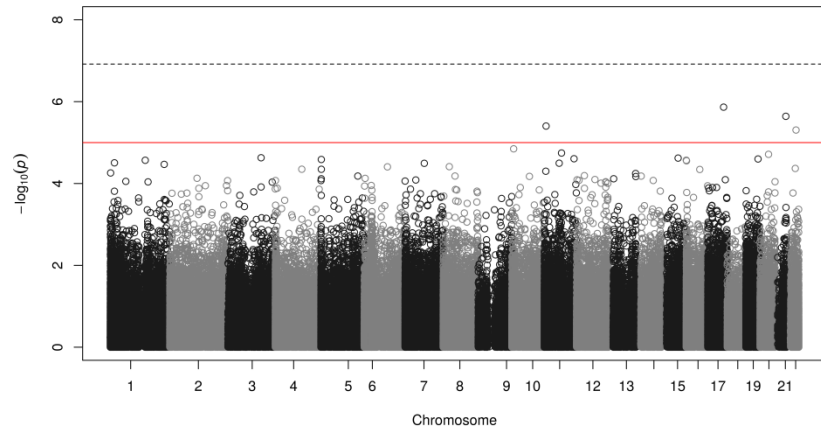

**b. TPA – non-linear**

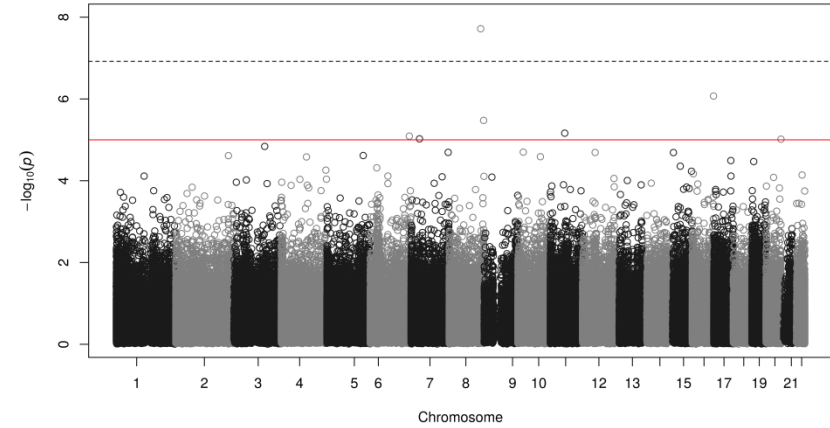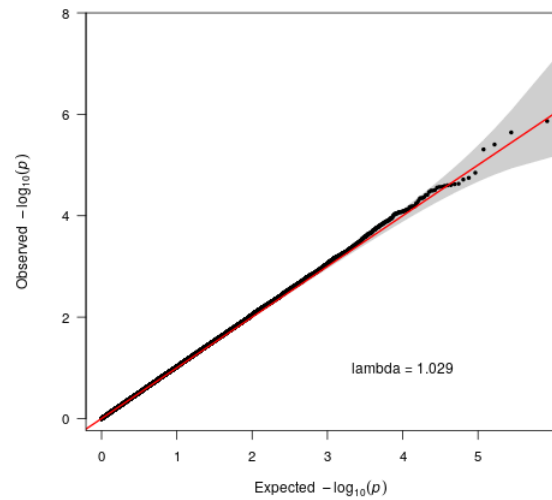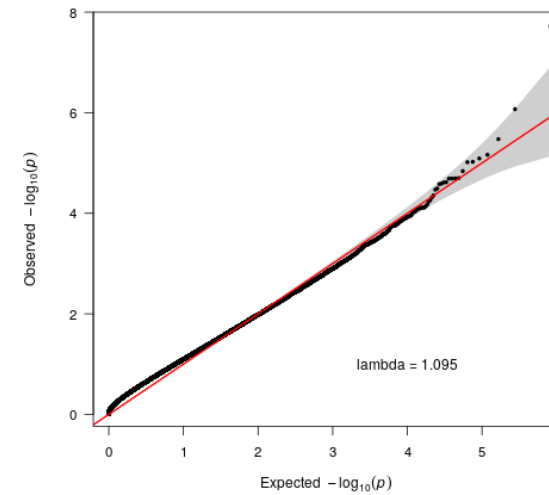

Supplement: NIHMS1540373-supplement-Supplemental_Data_File___doc___tif__pdf__etc___9.pdf [file NIHMS1540373-supplement-Supplemental_Data_File___doc___tif__pdf__etc___9.pdf]
